# Supplementary material for: Hyper-connectivity between the left motor cortex and prefrontal cortex is associated with the severity of dysfunction of the descending pain modulatory system in fibromyalgia
Source: PubMed Central journal article supplement (PMC9140239; doi:10.1371/journal.pone.0247629), 2022-05-27
Supplement: pone.0247629.s001.pdf [file pone.0247629.s001.pdf]

| subject | cpm_cat | psychiatric_diagnoses | opioid | n_opioid | Lfc_Lmc  | Lfc_Rfc  | Lfc_Rmc | Lmc_Rfc | Lmc_Rmc | Rfc_Rmc |
|---------|---------|-----------------------|--------|----------|----------|----------|---------|---------|---------|---------|
| 1       | 2.00    |                       | 2.00   | 2.00     | .679297  | .788206  | .548976 | .761810 | .819433 | .864691 |
| 2       | 1.00    |                       | 1.00   | 2.00     | .537581  | .403188  | .334718 | .312130 | .287628 | .266339 |
| 3       | 2.00    |                       | 2.00   | 2.00     | .728465  | .746816  | .511170 | .601925 | .477118 | .526169 |
| 4       | 1.00    |                       | 2.00   | 2.00     | .745169  | .617113  | .688711 | .705984 | .970521 | .741474 |
| 5       | 1.00    |                       | 2.00   | 2.00     | .596546  | .824981  | .536934 | .576740 | .530685 | .624293 |
| 6       | 1.00    |                       | 2.00   | 2.00     | .577015  | .513591  | .462220 | .546491 | .637490 | .533566 |
| 7       | 1.00    |                       | 2.00   | 2.00     | .555332  | .703584  | .512414 | .500046 | .445460 | .449544 |
| 8       | 2.00    |                       | 2.00   | 1.00     | .836914  | .847282  | .806435 | .676151 | .649847 | .701168 |
| 9       | 1.00    |                       | 2.00   | 2.00     | .603714  | .727585  | .518398 | .564125 | .473563 | .517611 |
| 10      | 2.00    |                       | 2.00   | 2.00     | .577423  | .678094  | .670350 | .495302 | .561129 | .792567 |
| 11      | 1.00    |                       | 1.00   | 2.00     | .224456  | .458652  | .230374 | .203522 | .184336 | .251455 |
| 12      | 2.00    |                       | 2.00   | 2.00     | .754164  | 1.009965 | .590486 | .644501 | .491017 | .622552 |
| 13      | 2.00    |                       | 1.00   | 1.00     | .916237  | .958442  | .691833 | .932100 | .766452 | .716621 |
| 14      | 2.00    |                       | 2.00   | 2.00     | .553416  | .510135  | .538336 | .479978 | .437818 | .335603 |
| 15      | 1.00    |                       | 2.00   | 1.00     | .673689  | 1.041676 | .419703 | .567604 | .318452 | .373579 |
| 16      | 2.00    |                       | 2.00   | 2.00     | .817950  | .645324  | .704493 | .570734 | .729624 | .614158 |
| 17      | 1.00    |                       | 2.00   | 2.00     | .574866  | .791112  | .467346 | .522764 | .607789 | .484159 |
| 18      | 1.00    |                       | 1.00   | 2.00     | .754504  | .635664  | .513341 | .484433 | .644890 | .394074 |
| 19      | 1.00    |                       | 1.00   | 2.00     | .491249  | .464430  | .493531 | .333086 | .292573 | .582870 |
| 20      | 2.00    |                       | 1.00   | 2.00     | .942994  | .890081  | .532384 | .762032 | .518098 | .507763 |
| 21      | 1.00    |                       | 2.00   | 2.00     | .689263  | .685100  | .595992 | .497682 | .502714 | .913120 |
| 22      | 2.00    |                       | 2.00   | 2.00     | .788981  | .856219  | .605795 | .709508 | .716789 | .609613 |
| 23      | 1.00    |                       | 2.00   | 2.00     | .438943  | .642170  | .309090 | .511205 | .593569 | .333256 |
| 24      | 2.00    |                       | 2.00   | 2.00     | .569370  | .813064  | .612728 | .549618 | .464418 | .691381 |
| 25      | 1.00    |                       | 1.00   | 2.00     | .582612  | .989030  | .591185 | .577868 | .398957 | .624576 |
| 26      | 1.00    |                       | 2.00   | 1.00     | .360867  | .585675  | .398113 | .279458 | .239229 | .342640 |
| 27      | 2.00    |                       | 1.00   | 2.00     | .880007  | .788514  | .614374 | .747435 | .760382 | .549151 |
| 28      | 2.00    |                       | 2.00   | 1.00     | .773730  | .672158  | .582626 | .682500 | .775597 | .604789 |
| 29      | 1.00    |                       | 2.00   | 2.00     | .674565  | .983573  | .540321 | .606208 | .425576 | .539536 |
| 30      | 1.00    |                       | 2.00   | 2.00     | .717296  | .887889  | .795345 | .657075 | .651854 | .782867 |
| 31      | 1.00    |                       | 2.00   | 2.00     | .737898  | .670199  | .619878 | .509326 | .619928 | .704875 |
| 32      | 2.00    |                       | 2.00   | 2.00     | .526411  | .691838  | .504662 | .462971 | .385974 | .504590 |
| 33      | 1.00    |                       | 2.00   | 2.00     | .707827  | .754292  | .585454 | .733586 | .689201 | .769995 |
| 34      | 1.00    |                       | 1.00   | 2.00     | 1.016093 | 1.046646 | .875868 | .929999 | .979919 | .875035 |
| 35      | 1.00    |                       | 2.00   | 1.00     | .431313  | .573025  | .392844 | .355267 | .319837 | .426308 |
| 36      | 1.00    |                       | 1.00   | 1.00     | .798960  | .862867  | .800299 | .711008 | .855850 | .725256 |
| 37      | 1.00    |                       | 1.00   | 2.00     | .490066  | .893159  | .309116 | .386918 | .246300 | .256641 |

|                       |                                                                                                                             |
|-----------------------|-----------------------------------------------------------------------------------------------------------------------------|
| subject               | Subject number.                                                                                                             |
| cpm_cat               | Conditioned Pain Modulation (CPM) test category:<br>1: Responder;<br>2: Non-responder;                                      |
| psychiatric_diagnoses | >1 psychiatric disorder according to the MINI:<br>1: Yes;<br>2: No;                                                         |
| opioid                | Opioid use per day $\geq 5$ mg by mean morphine-equivalent dose:<br>1: Regular opioid use;<br>2: No use/Minimal opioid use; |
| n_opioid              | Number of days of non-opioid analgesic use in the last month $\geq 4$ days per week:<br>1: Yes;<br>2: No;                   |
| Lfc_Lmc               | Functional Connectivity Z Values between:<br>Left Prefrontal Cortex and Left Motor Cortex;                                  |
| Lfc_Rfc               | Functional Connectivity Z Values between:<br>Left Prefrontal Cortex and Right Prefrontal Cortex;                            |
| Lfc_Rmc               | Functional Connectivity Z Values between:<br>Left Prefrontal Cortex and Right Motor Cortex;                                 |
| Lmc_Rfc               | Functional Connectivity Z Values between:<br>Left Motor Cortex and Right Prefrontal Cortex;                                 |
| Lmc_Rmc               | Functional Connectivity Z Values between:<br>Left Motor Cortex and Right Motor Cortex;                                      |
| Rfc_Rmc               | Functional Connectivity Z Values between:<br>Right Prefrontal Cortex and Right Motor Cortex;                                |
